# Supplementary material for: Silencing of a large microRNA cluster on human chromosome 14q32 in melanoma: biological effects of mir-376a and mir-376c on insulin growth factor 1 receptor
Source: Mol Cancer. 2012 Jul 2;11:44. doi: 10.1186/1476-4598-11-44 (PMC3444916; doi:10.1186/1476-4598-11-44)
Supplement: Additional file 1 — The expression levels of miRNAs in normal melanocytes and melanoma cell lines. [file 1476-4598-11-44-S1.xlsx]

## Sheet: all
	NHEM#1	NHEM#2	003-ENG	MEL33A1	MEL33B1	MEL938	MEL624
hsa-let-7a	3817.32	3433.12	1136.03	1338.57	1185.67	708.975	654.907
hsa-let-7a*	4.75934	3.11774	1.20685	1.48563	7.04591	-0.83466	1.1132
hsa-let-7b	3916.05	3497.37	363.135	1046.8	1277.01	189.576	177.844
hsa-let-7b*	11.7934	11.3683	13.9337	23.387	31.7089	17.2036	16.0023
hsa-let-7c	1797.29	1602.15	146.685	327.425	452.294	66.8499	50.2854
hsa-let-7d	377.238	328.765	82.6025	525.452	196.32	43.3558	21.1901
hsa-let-7d*	13.873	13.2366	10.3383	18.0641	13.6383	11.342	11.0918
hsa-let-7e	443.514	457.367	315.169	265.233	312.269	176.279	72.9346
hsa-let-7e*	4.22552	2.07282	0.140702	5.51573	3.4312	-0.895542	1.58029
hsa-let-7f	2337.13	2127.61	704.495	1097.81	804.762	383.602	341.053
hsa-let-7g	324.083	271.063	176.094	135.579	213.911	91.0541	57.6942
hsa-let-7i	640.448	534.236	104.463	618.72	1133.64	79.2359	46.0724
hsa-miR-100	270.971	226.358	9.82987	17.1022	117.996	5.44454	8.91802
hsa-miR-101	109.287	123.455	232.29	189.098	120.935	154.97	201.642
hsa-miR-103	717.402	641.825	1033.21	741.316	364.99	656.51	673.544
hsa-miR-106a	12.8298	7.74645	76.2331	99.7055	75.0986	52.5799	105.506
hsa-miR-106b	279.169	261.951	807.448	895.255	776.709	817.709	1489.69
hsa-miR-107	991.743	935.802	1358.79	821.477	444.918	1102.8	1333.52
hsa-miR-10b*	13.0043	8.66271	12.9833	11.9114	13.2029	10.4301	10.9591
hsa-miR-1224-3p	9.23484	8.97484	11.7462	8.8621	16.6175	15.347	8.71719
hsa-miR-1224-5p	106.149	91.5002	126.804	107.191	78.4018	83.3089	87.6881
hsa-miR-1225-3p	26.0502	19.7375	38.6889	16.683	22.0764	20.3418	21.2445
hsa-miR-1225-5p	475.645	416.254	855.872	603.174	322.481	332.778	283.343
hsa-miR-1226*	49.2424	38.5998	93.7344	28.3735	32.2059	26.6842	23.1218
hsa-miR-1227	8.1184	6.92119	7.68053	12.8727	25.994	11.2208	9.5024
hsa-miR-1228	31.606	26.9301	47.9329	29.8151	29.5179	28.8634	35.8222
hsa-miR-1228*	4.80771	5.28574	9.80904	14.864	16.7547	9.08573	7.63753
hsa-miR-1229	15.139	13.1377	15.0307	14.5869	17.1123	13.1805	12.7108
hsa-miR-1234	130.261	101.675	208.463	50.1568	90.1819	89.5149	79.3179
hsa-miR-1236	7.56157	5.95962	8.37498	5.85868	10.9543	9.44037	4.85201
hsa-miR-1238	16.173	13.6136	29.985	12.9011	24.5108	19.6978	21.2628
hsa-miR-125a-3p	78.2653	59.9315	120.223	68.9901	88.9923	59.2487	75.9953
hsa-miR-125a-5p	130.26	128.08	71.8278	82.23	63.8496	51.155	32.5246
hsa-miR-125b	2364.06	1964.34	43.3878	206.026	282.994	28.0057	34.2143
hsa-miR-127-3p	271.912	247.426	2.11981	-0.703998	1.15325	1.28562	-0.0690885
hsa-miR-128	26.4689	16.794	36.3888	38.6675	25.0136	21.6356	22.2237
hsa-miR-130a	1497.79	1528.17	685.517	1313.57	118.33	342.245	790.88
hsa-miR-130b	176.566	156.919	192.354	143.241	214.059	162.887	239.541
hsa-miR-134	156.693	124.571	221.035	28.6407	53.2414	62.1188	42.9498
hsa-miR-135a*	120.116	67.2272	343.24	53.4784	52.1507	70.2799	42.4052
hsa-miR-136	325.859	386.525	0.748748	0.646584	10.5612	0.479727	0.266822
hsa-miR-136*	45.4824	49.453	-3.42114	-4.04955	-3.09191	-3.55194	-2.60364
hsa-miR-137	61.2342	47.6575	-2.9746	-4.79259	-2.65662	-2.92291	-3.54522
hsa-miR-138	25.3208	19.5247	14.266	-3.60616	16.9246	4.62562	3.95735
hsa-miR-138-2*	10.8101	6.80075	10.6422	6.11523	7.71417	7.96582	9.37124
hsa-miR-139-3p	29.6575	20.5122	23.1218	16.2984	21.6889	13.7055	15.1364
hsa-miR-140-3p	72.3007	63.2097	109.781	585.88	121.574	63.2736	65.6834
hsa-miR-140-5p	48.938	46.5415	75.8709	322.882	54.1592	36.8589	31.0039
hsa-miR-143	12.8238	17.3785	-3.84753	-5.91237	-4.17359	-4.00843	-3.48141
hsa-miR-145	59.1612	81.3442	-0.919912	0.558064	9.04704	0.936898	1.83955
hsa-miR-146a	35.9346	28.6443	3690.77	58.6731	1175.7	2265.74	2103.92
hsa-miR-148a	48.9495	35.3652	99.5273	41.4858	99.9678	49.8485	43.838
hsa-miR-148b	15.9666	13.9015	25.0509	22.9791	19.4085	9.0817	11.7399
hsa-miR-149	21.8064	19.1256	27.0646	69.9553	39.7067	18.5225	7.91235
hsa-miR-149*	7.56793	4.16394	13.367	24.3313	5.94974	4.21679	3.77348
hsa-miR-150*	184.996	149.021	416.298	75.6601	84.3299	89.0089	64.6521
hsa-miR-151-3p	46.6682	39.3897	57.9286	51.84	77.31	32.609	45.1719
hsa-miR-151-5p	144.148	123.266	140.992	84.8994	119.32	96.7376	125.876
hsa-miR-152	86.8834	79.1083	19.5912	-4.59641	39.069	5.63719	6.62567
hsa-miR-154	49.6328	39.4786	-1.17427	3.32736	0.182053	-1.44045	0.499399
hsa-miR-155	24.8717	15.0169	40.9751	243.295	8.91002	6.76431	5.15985
hsa-miR-15a	414.232	429.336	601.207	260.333	499.893	490.404	501.56
hsa-miR-15b	246.221	183.883	324.536	309.074	142.467	220.836	234.546
hsa-miR-16	1271.79	1194.38	1873.08	1238	1218.43	1694.54	1941.21
hsa-miR-17	140.376	126.527	793.317	1015.1	545.643	587.048	1037.8
hsa-miR-17*	19.4083	20.0041	82.3172	122.3	82.7172	73.9551	163.204
hsa-miR-181a	222.824	205.888	91.4241	163.18	276.642	70.0584	127.485
hsa-miR-181b	137.98	125.686	87.4039	137.987	252.01	69.7439	131.764
hsa-miR-181c	16.3118	18.13	17.0276	6.21812	9.99507	10.9962	14.2241
hsa-miR-181d	55.5896	45.2852	35.2127	24.7352	101.537	22.2935	37.3076
hsa-miR-185	94.7372	80.3613	315.622	133.67	182.697	223.385	299.522
hsa-miR-186	38.4855	34.891	43.7296	53.0689	50.5601	43.4495	81.9537
hsa-miR-187*	10.6205	7.68143	22.0748	-0.438129	2.2082	3.92414	0.80464
hsa-miR-188-5p	115.001	89.6173	151.194	120.001	111.988	89.8916	87.349
hsa-miR-18a	32.4379	26.5494	271.837	360.677	142.854	226.551	445.722
hsa-miR-18b	12.279	8.30545	186.401	176.577	120.946	147.459	238.507
hsa-miR-191*	9.94645	6.07351	11.679	8.9185	10.0044	9.33728	12.6884
hsa-miR-193a-3p	577.712	768.476	3.1736	366.628	63.5157	12.88	49.3938
hsa-miR-193a-5p	140.321	146.536	8.79295	57.1921	22.2408	6.50616	12.1466
hsa-miR-193b	354.836	367.624	105.177	616.323	122.343	123.556	157.092
hsa-miR-193b*	17.898	10.6156	6.90329	12.5954	11.4935	5.47977	6.6551
hsa-miR-195	14.8371	16.4353	8.01636	42.4035	13.0564	8.98205	14.7708
hsa-miR-196a	162.921	142.343	52.2355	50.4865	63.6753	26.56	21.6907
hsa-miR-196b	74.7787	74.4657	33.0225	111.784	7.35573	15.6656	18.0642
hsa-miR-197	135.388	128.653	186.625	192.103	336.237	165.453	131.28
hsa-miR-198	77.675	62.7458	49.5205	72.0679	57.7778	51.4403	51.6727
hsa-miR-199a-5p	3106.58	3008.43	-1.75252	2.71702	-1.14871	-0.96923	-0.576403
hsa-miR-199b-3p	1446.06	1230.95	-1.70408	-2.85958	1.07036	-0.509706	1.01429
hsa-miR-199b-5p	709.813	703.492	-2.07198	-2.32654	10.3275	1.29831	6.14253
hsa-miR-19a	195.991	210.738	933.084	888.261	435.512	793.692	1536.47
hsa-miR-19b	629.323	678.85	2357.31	2556.45	1556.51	1922.91	3548.44
hsa-miR-202	17.5239	13.0632	17.6057	15.3783	12.7615	6.39987	9.0865
hsa-miR-20a	214.402	205.552	1063.28	1381.35	621.723	951.88	1836.46
hsa-miR-20b	69.8152	65.0758	521.09	531.442	337.413	403.023	642.55
hsa-miR-21	1429.8	1550.67	1041.14	4059.39	1849.42	720.44	1233.14
hsa-miR-21*	37.7348	41.4905	30.282	290.443	92.6116	29.493	49.3957
hsa-miR-210	90.4623	94.4404	84.0612	164.72	64.1221	50.3235	33.5606
hsa-miR-211	11.3231	6.96125	2732.93	10.2	123.583	748.604	983.571
hsa-miR-212	61.9027	55.5552	36.3321	40.963	30.4398	29.5382	40.4641
hsa-miR-214	800.1	791.831	0.0427601	-3.18285	-0.81837	-0.0136317	-2.09938
hsa-miR-214*	57.3179	49.7592	-2.93136	-2.1904	-1.99227	-1.8944	-1.07795
hsa-miR-218	10.9104	7.05127	0.666353	1.033	1.96653	0.624722	0.140616
hsa-miR-22	5385.6	5620.8	1417.87	2004.72	2587.85	1031.25	715.603
hsa-miR-22*	41.9575	39.0512	9.20539	9.21146	8.24875	3.88448	4.98199
hsa-miR-221	2333.02	1885.39	156.832	406.102	1610.17	65.0124	33.3819
hsa-miR-221*	24.4915	18.4524	-1.04795	1.9277	9.01895	0.333954	1.16976
hsa-miR-222	903.048	741.318	50.7461	134.085	620.071	57.0791	86.7329
hsa-miR-224	11.794	6.56639	-1.6284	26.1676	3.71495	-0.362755	-2.18584
hsa-miR-23a	4436.18	3872.03	2301.5	2040.59	1018.89	1049.8	591.26
hsa-miR-23a*	17.9644	13.3313	16.6095	16.7713	18.9743	12.3559	15.9732
hsa-miR-23b	1367.18	1369.96	650.084	484.322	559.507	280.269	74.1722
hsa-miR-23b*	4.625	2.78104	1.29783	2.97146	2.4876	-1.02695	-0.857791
hsa-miR-24	3528.93	3525.98	2141.56	2518.38	1309.61	1146.15	697.873
hsa-miR-24-1*	15.2765	18.0726	10.2778	12.2655	13.3632	3.49827	1.85586
hsa-miR-25	90.8869	62.2739	309.999	318.485	248.12	248.236	426.51
hsa-miR-26a	596.742	511.976	239.787	285.897	259.315	116.943	200.811
hsa-miR-26b	103.463	78.832	63.6988	35.6913	35.5572	27.8805	25.3158
hsa-miR-27a	3614.44	3810.19	2192.11	1845.09	927.611	935.242	431.972
hsa-miR-27b	1743.11	1919.05	1087.55	764.102	1048.12	467.953	100.104
hsa-miR-28-5p	47.01	47.6927	52.7262	29.3913	38.2341	32.1082	39.1384
hsa-miR-296-5p	7.65893	7.73566	12.8761	11.3819	10.7212	6.65125	10.2395
hsa-miR-299-3p	32.4425	27.748	-1.24582	-3.5489	-0.554753	-1.56928	0.774292
hsa-miR-299-5p	39.0121	29.2401	-0.0321845	6.64673	5.53832	-0.230105	1.59575
hsa-miR-29a	6867.84	6044.58	3779.49	6183.18	1922.3	2676.89	3884.48
hsa-miR-29a*	18.799	19.6128	10.8233	16.0095	7.46435	5.84708	8.72333
hsa-miR-29b	5321.88	4713.25	5906.21	9517.3	2249.45	3388.33	4894.06
hsa-miR-29b-1*	24.175	17.2498	30.112	31.7221	15.4331	16.8348	25.7996
hsa-miR-29c	1839.12	1586.01	1110.51	1752.48	562.173	472.895	668.632
hsa-miR-29c*	7.18103	5.7991	1.70893	7.25739	1.73766	3.14588	2.69595
hsa-miR-300	7.52387	7.24868	16.3569	1.80919	12.9241	16.9617	9.70472
hsa-miR-301a	38.4484	43.0519	224.179	160.534	59.4707	104.379	118.058
hsa-miR-301b	7.00673	6.50737	37.8993	18.6176	19.035	16.7944	32.9442
hsa-miR-30a	627.414	558.789	189.299	330.853	215.165	183.091	304.14
hsa-miR-30a*	21.0068	14.4522	3.06931	9.21652	2.93328	4.19694	8.52709
hsa-miR-30b	56.756	47.439	114.399	77.2264	93.9451	77.8763	135.884
hsa-miR-30c	115.185	83.7494	51.6764	95.4682	44.8458	43.1892	69.8864
hsa-miR-30c-1*	2.33332	1.27921	3.37381	3.17422	3.80932	2.45708	3.01555
hsa-miR-30c-2*	14.5283	10.8141	7.08885	13.4906	10.7347	6.60091	7.91418
hsa-miR-30d	147.262	128.522	247.899	212.722	339.03	164.139	279.894
hsa-miR-30e	224.315	214.015	196.122	246.153	243.232	182.012	307.717
hsa-miR-30e*	9.85405	5.56747	1.96661	5.68745	1.74464	2.40924	4.14423
hsa-miR-31	259.878	303.49	123.649	225.774	149.132	78.8644	46.4507
hsa-miR-31*	58.5297	74.1006	38.7803	75.2551	28.9044	16.3387	5.6931
hsa-miR-32	12.6108	16.2473	71.1704	43.8152	21.0307	41.4943	43.6423
hsa-miR-32*	27.2624	33.3809	65.8977	57.881	68.1827	53.4944	45.4895
hsa-miR-320	321.673	308.843	188.077	202.415	360.849	180.862	311.051
hsa-miR-324-3p	936.677	794.896	709.607	779.188	911.404	594.889	877.521
hsa-miR-324-5p	151.192	125.505	220.93	134.91	89.62	107.311	72.02
hsa-miR-328	24.6185	25.2479	24.1447	26.0869	44.9834	29.2831	20.5013
hsa-miR-329	9.47502	6.2528	-1.06557	0.380045	-3.45895	-2.15333	-0.820631
hsa-miR-331-3p	154.552	153.373	218.701	221.444	90.1337	125.197	67.7965
hsa-miR-337-3p	23.4507	17.3767	-0.87957	5.72816	-0.137907	-0.142478	1.92004
hsa-miR-337-5p	123.359	123.611	-2.53168	-2.76018	-3.11449	-2.26561	-1.20936
hsa-miR-338-5p	17.4724	12.5426	12.567	14.2117	13.4144	10.0308	15.6419
hsa-miR-33a	15.5584	21.3565	25.3159	44.1943	32.9767	23.6581	42.2488
hsa-miR-33b*	7.15758	4.24865	12.2519	5.2744	6.70747	6.56636	7.23273
hsa-miR-342-3p	35.8278	24.1799	20.0168	81.1237	-1.10161	5.9216	3.71975
hsa-miR-345	22.4486	15.7627	15.7869	12.191	26.9979	11.5234	15.3965
hsa-miR-34a	1801.58	1686.28	1915.9	331.203	667.186	814.715	110.821
hsa-miR-34a*	24.9211	22.9888	31.2094	8.01752	11.0104	8.37658	-0.388754
hsa-miR-34b	13.8584	11.4734	9.49789	7.73467	36.5033	24.96	5.86361
hsa-miR-34b*	301.614	285.927	219.785	124.449	94.4929	112.916	33.8506
hsa-miR-34c-3p	5.57712	1.9313	20.449	-1.20397	0.144988	2.22644	1.02736
hsa-miR-34c-5p	42.4597	43.931	4.18072	43.5803	0.693792	4.51036	2.09159
hsa-miR-361-3p	16.2883	10.3839	28.2295	14.2519	13.8552	21.2562	26.8812
hsa-miR-361-5p	76.9976	56.851	116.026	87.7787	112.485	41.5005	17.1327
hsa-miR-362-3p	32.8576	33.9199	26.0157	15.0551	20.3085	27.9249	58.8221
hsa-miR-362-5p	29.7749	24.0765	22.9132	20.8291	29.5064	12.1409	22.3304
hsa-miR-365	596.339	546.861	100.304	553.203	89.2089	71.6709	90.0908
hsa-miR-370	54.2321	44.9091	17.4782	14.5971	19.5808	11.7572	15.2258
hsa-miR-371-5p	126.479	97.841	312.083	66.0147	58.3945	76.454	55.3988
hsa-miR-373*	21.2916	15.5827	55.2559	3.19767	4.63138	10.9511	2.23468
hsa-miR-374a	41.3031	27.6653	33.9567	21.6838	22.0952	20.242	18.3861
hsa-miR-374b	30.6739	22.5233	34.1446	25.9473	23.4325	14.8112	18.6236
hsa-miR-376a	228.027	214.95	-4.05356	-6.06507	-4.18132	-6.80615	-3.68839
hsa-miR-376a*	26.6297	22.893	-2.07203	-2.97778	-2.14845	-0.724639	-2.32214
hsa-miR-376b	35.4726	31.7163	-4.61955	-5.76043	-3.8316	-4.33908	-4.3825
hsa-miR-376c	171.497	165.643	-2.21306	-4.04717	0.111953	-4.07742	-3.82423
hsa-miR-377	445.099	439.138	-2.82157	-3.47631	-2.94999	-3.54815	-3.12301
hsa-miR-377*	4.15782	2.23046	-0.769742	-0.667826	-2.9783	-1.8984	-0.0277615
hsa-miR-378	46.7198	23.5026	84.8954	232.216	134.38	52.0369	85.5784
hsa-miR-379	91.5307	70.3189	-2.09803	-2.9814	-3.46486	-1.99512	-3.22598
hsa-miR-381	127.37	115.275	17.8098	1.40992	11.1289	16.5272	8.86407
hsa-miR-382	34.9026	24.862	1.81315	1.92646	1.78168	0.734409	0.45655
hsa-miR-409-3p	78.1791	54.8916	0.372169	-0.517117	0.597336	-1.92054	-0.0734661
hsa-miR-409-5p	11.5898	7.14812	-2.59733	-2.62193	-2.54067	-1.87124	-1.84053
hsa-miR-410	34.1517	29.3345	-3.42758	-1.30895	-2.31983	-2.92532	-1.12182
hsa-miR-411	37.5071	32.5632	-3.26021	-4.71941	-1.83521	-3.62095	-3.26846
hsa-miR-411*	4.81201	3.5325	0.684855	-0.531195	-0.610932	6.66161	1.72716
hsa-miR-422a	8.26926	4.94664	11.2954	5.26408	5.27673	8.44357	4.9476
hsa-miR-423-3p	19.7044	17.7826	18.5255	21.6496	20.656	12.8328	14.4119
hsa-miR-423-5p	67.4145	61.7551	74.1732	59.7455	81.2801	35.2172	41.2407
hsa-miR-424	454.394	599.09	79.7784	69.6402	152.626	28.6453	26.1769
hsa-miR-424*	15.4843	15.0077	1.83583	2.85557	22.1269	2.66919	5.46349
hsa-miR-425	101.916	90.6269	177.164	134.172	104.647	98.2499	83.379
hsa-miR-425*	11.5417	9.30284	16.3538	12.0713	10.7237	9.99432	14.3582
hsa-miR-431	12.7817	10.2912	2.98939	0.390305	2.24834	1.36285	2.65577
hsa-miR-431*	7.32873	3.03488	8.41075	25.3308	19.4011	6.47752	9.67014
hsa-miR-432	41.4247	34.5544	8.36484	8.95463	40.7106	4.57858	6.2218
hsa-miR-450a	17.7635	19.2353	1.80289	1.08892	4.56805	-0.606701	-0.488814
hsa-miR-455-3p	181.8	153.684	16.4162	96.2451	73.7692	3.71764	2.29465
hsa-miR-455-5p	27.0681	21.9254	0.373675	19.7051	15.1083	-0.596908	1.64232
hsa-miR-483-3p	26.8115	26.3081	37.3393	34.6088	46.9064	43.3606	29.2762
hsa-miR-483-5p	67.1545	55.8536	65.6858	105.863	74.669	48.0671	52.2385
hsa-miR-484	21.2182	20.9011	20.7921	49.562	45.2129	45.8168	82.049
hsa-miR-485-3p	29.0462	28.1541	24.8365	16.2377	25.4067	31.5853	17.8794
hsa-miR-486-5p	24.2881	19.5242	33.9675	23.8408	24.29	16.5285	15.0346
hsa-miR-487b	75.1733	60.318	13.7205	21.2052	11.3458	8.03768	5.86558
hsa-miR-490-5p	6.85829	4.03001	12.1552	3.00128	5.12991	3.89307	3.62832
hsa-miR-492	10.0081	7.73806	40.7356	5.54983	2.17826	6.95182	5.2978
hsa-miR-493*	25.3884	16.3994	-2.065	-2.91614	0.895681	-1.33145	-2.20494
hsa-miR-494	5049.08	3675.54	3865.9	5134.15	7933.09	2952.75	4367.92
hsa-miR-495	8.16948	3.74212	-1.91128	-3.44955	-3.01411	-2.97367	-1.2013
hsa-miR-498	26.9138	19.4746	44.4643	12.437	11.3286	12.2082	9.05381
hsa-miR-500	40.8371	30.3877	39.5423	34.6724	36.9478	29.8019	44.5825
hsa-miR-500*	34.9862	25.2487	20.8633	26.0761	32.6699	28.5976	52.4083
hsa-miR-501-3p	10.9706	5.68544	5.60716	-0.0416455	14.3616	8.85292	15.7446
hsa-miR-501-5p	23.8517	19.717	23.2017	21.1107	24.0062	20.6488	33.2487
hsa-miR-502-3p	28.8331	21.3419	13.7358	16.4841	21.0122	18.5017	40.0081
hsa-miR-502-5p	8.26916	7.4512	3.53997	7.76646	7.32271	5.31335	12.5419
hsa-miR-503	54.7415	60.0049	17.2646	26.9336	29.2613	1.34427	1.17424
hsa-miR-505	11.1783	7.28694	7.83061	23.2308	5.28406	2.76129	2.10309
hsa-miR-509-3-5p	10.721	5.78652	5.99798	7.67144	9.07256	11.8797	13.9657
hsa-miR-512-3p	16.7489	11.7379	14.4302	13.4348	13.798	10.4025	12.0875
hsa-miR-513a-5p	654.419	468.722	415.88	582.882	972.729	380.556	550.347
hsa-miR-513b	381.045	252.646	239.099	332.665	508.019	219.31	327.685
hsa-miR-513c	156.542	101.51	93.2659	136.27	211.872	90.9267	135.655
hsa-miR-516a-5p	14.379	3.275	3.7994	7.24605	26.2675	3.64384	13.0731
hsa-miR-518c*	6.19571	3.3945	5.61955	8.56087	10.1064	5.06825	4.22218
hsa-miR-532-3p	22.8657	16.5462	10.9933	8.14882	14.4959	13.4346	25.6135
hsa-miR-532-5p	39.8901	34.0852	20.7915	20.5984	35.0164	16.7989	31.0486
hsa-miR-542-3p	55.9659	64.0554	5.96867	7.83176	22.9288	-0.31684	-0.15157
hsa-miR-542-5p	40.8645	45.1131	7.28754	6.15389	16.2616	3.06055	3.35672
hsa-miR-543	10.9491	5.9853	-2.36167	-0.824939	-1.0797	-1.65816	-0.354345
hsa-miR-545	7.85081	7.14622	4.7183	1.13621	3.96178	1.02765	1.39365
hsa-miR-551b	13.8478	11.9425	359.462	0.503307	52.0577	175.459	14.187
hsa-miR-557	12.4263	10.6237	28.2771	13.111	8.23382	8.03149	6.45209
hsa-miR-564	25.8732	20.9774	20.4539	19.0545	25.7104	19.4482	22.8704
hsa-miR-572	65.6042	58.2676	64.9127	8.39838	52.1506	41.1832	35.8728
hsa-miR-574-3p	199.518	219.273	184.604	277.23	308.844	216.5	144.867
hsa-miR-574-5p	326.203	310.779	275.126	390.123	420.408	222.799	250.872
hsa-miR-575	183.453	159.391	182.278	170.04	193.95	128.16	169.103
hsa-miR-584	15.3324	13.0026	41.4625	41.6684	45.2871	26.9922	35.9766
hsa-miR-590-5p	39.7494	40.5849	89.0372	13.799	42.8264	43.5439	77.4809
hsa-miR-595	11.933	13.4158	18.5096	29.2905	33.5943	15.1787	16.9281
hsa-miR-601	15.1687	10.9603	26.2449	17.0732	17.8744	10.6811	10.448
hsa-miR-602	44.2713	35.6443	94.8199	16.6811	16.9405	19.3492	15.2934
hsa-miR-605	8.42036	8.2848	12.6166	12.0987	10.2216	13.8537	11.2273
hsa-miR-609	10.1263	8.72667	18.2707	1.07748	16.9018	18.9698	11.4545
hsa-miR-615-3p	15.0553	16.1137	12.7279	8.62098	17.506	14.0046	9.71241
hsa-miR-622	9.30546	5.42375	9.13283	9.08727	9.63588	7.85589	7.05927
hsa-miR-623	12.5967	10.332	16.1556	14.5538	30.0436	8.43577	9.77548
hsa-miR-628-3p	5.93337	1.71168	4.67848	0.842943	2.41175	2.59562	2.12851
hsa-miR-629*	69.5176	53.8208	270.493	36.8086	23.6498	51.314	29.7346
hsa-miR-630	236.779	129.963	207.957	34.5322	32.6384	86.1681	24.6257
hsa-miR-636	39.9291	30.671	64.6544	12.4585	16.8231	23.3182	20.9357
hsa-miR-638	450.253	389.827	483.288	85.7506	335.034	299.251	267.851
hsa-miR-650	12.6127	6.1986	8.5024	3.08311	10.9305	8.13631	17.238
hsa-miR-654-3p	73.3628	60.1979	5.94544	14.2461	9.27776	11.0751	5.88678
hsa-miR-654-5p	43.03	34.5997	29.9901	1.67503	19.5761	34.5566	32.9169
hsa-miR-660	34.2764	30.7205	22.2085	15.8128	29.6371	25.8	51.3907
hsa-miR-662	35.5556	25.4572	46.0311	33.8692	28.5656	30.9934	32.4633
hsa-miR-663	68.6295	51.2894	129.09	23.7709	37.0909	57.0048	35.6611
hsa-miR-665	8.1821	4.9971	5.7788	3.35007	7.76555	5.04993	5.11286
hsa-miR-671-5p	56.5171	42.7924	60.5358	57.3182	67.1851	41.5967	39.0917
hsa-miR-708	9.9656	4.0828	9.94485	10.4876	3.62519	2.74238	2.32341
hsa-miR-744	17.7029	12.4299	26.3068	49.2763	21.5737	9.6168	4.14972
hsa-miR-744*	6.7102	4.61356	4.06909	21.2522	29.1981	8.65846	4.12935
hsa-miR-758	25.5335	21.2032	1.24634	1.448	-1.06359	6.5093	0.906527
hsa-miR-760	16.477	11.217	27.0361	10.507	9.06547	13.5773	13.0431
hsa-miR-765	35.4257	26.9717	35.4444	96.9219	62.5095	30.3256	37.9551
hsa-miR-766	24.2455	24.5902	33.4866	26.8147	85.6818	32.2579	29.4892
hsa-miR-768-3p	177.063	154.061	114.403	187.944	116.327	110.714	96.2651
hsa-miR-768-5p	108.283	117.379	93.9054	2.08854	121.34	85.759	68.3142
hsa-miR-769-3p	7.64955	4.05444	10.0181	13.0634	11.327	8.738	9.22254
hsa-miR-769-5p	16.0126	15.6267	6.54169	61.561	13.1722	3.00508	9.40959
hsa-miR-770-5p	29.5297	20.7072	26.9085	15.1315	11.6783	8.31938	12.1655
hsa-miR-801	48.0004	39.0834	90.3685	29.823	106.372	128.214	185.615
hsa-miR-874	200.233	140.627	357.081	61.7234	85.4132	92.7666	59.658
hsa-miR-877	13.0463	6.13561	34.6819	6.1448	7.89641	10.0465	8.32559
hsa-miR-877*	21.5037	24.7155	28.5388	29.5847	40.1743	32.3435	27.3405
hsa-miR-885-5p	20.6911	21.1739	25.1091	29.1951	72.4696	29.0456	19.655
hsa-miR-886-3p	1138.04	1071.74	1.18538	918.015	0.748801	2.62739	2.83555
hsa-miR-886-5p	1.42297	-0.226702	-2.02156	-2.48868	-3.78754	-3.07684	-3.54312
hsa-miR-887	35.6616	25.9585	62.9704	22.6861	22.5492	34.5386	52.4992
hsa-miR-892b	56.6875	47.327	51.3501	53.178	50.9035	36.5624	48.4168
hsa-miR-921	19.3246	11.6523	11.4756	24.6558	22.1201	10.8791	15.7864
hsa-miR-923	70907.3	54810.6	52633.6	147796	85350.4	46877.1	73119.2
hsa-miR-92a	253.836	222.68	736.026	831.153	571.636	640.097	1019.24
hsa-miR-92b	4.05364	2.74638	2.77626	2.36975	6.31812	0.625679	2.01379
hsa-miR-93	162.095	133.819	570.316	748.517	557.877	357.873	572.283
hsa-miR-933	6.65201	5.61153	8.98518	7.24853	7.0563	8.41047	8.3123
hsa-miR-936	12.7274	8.62026	13.3682	8.45423	9.63286	4.39295	5.86115
hsa-miR-937	10.858	11.2059	17.3241	7.50157	20.6366	21.0338	13.8178
hsa-miR-939	171.068	167.226	219.325	108.489	189.642	144.728	134.496
hsa-miR-940	417.948	347.767	833.524	34.2342	158.261	252.252	198.739
hsa-miR-98	38.3099	30.4288	8.88171	47.8155	39.1338	6.42686	2.38765
hsa-miR-99a	103.62	89.0344	36.7251	16.0635	9.84759	10.1113	16.2366
hsa-miR-99b	126.727	106.84	123.225	120.437	126.122	83.0379	68.5737
hsa-miR-99b*	12.7314	11.2182	14.742	12.0733	11.1631	9.8645	11.2242
hsa-let-7c*	0.969041	-0.163873	-0.296981	-0.784315	-0.988826	-1.11381	0.0370509
hsa-let-7f-1*	6.40763	6.6944	8.98423	13.1463	20.5061	10.7954	9.55354
hsa-let-7f-2*	2.70254	2.05796	3.30216	-0.762976	4.02345	5.36726	1.92151
hsa-let-7g*	1.2579	-0.359022	-0.445267	1.95791	0.272595	-1.57934	2.66539
hsa-let-7i*	0.470681	0.226182	-2.31299	-1.21834	1.53563	-3.07033	-1.95758
hsa-miR-1	-2.6642	-4.65814	-4.9016	-6.06281	-3.78205	-2.78104	-4.47385
hsa-miR-100*	-1.4392	-2.41395	-0.89333	-4.27132	-0.403765	-2.37279	-2.26636
hsa-miR-101*	-0.0953107	-0.701439	0.654925	-3.59609	-1.65585	-0.688308	-1.16323
hsa-miR-105	-1.76298	-2.61822	-2.24501	-1.53374	25.2525	6.20976	15.796
hsa-miR-105*	-3.35158	-3.69021	-2.79792	-4.37431	-0.822791	-2.56866	-1.48326
hsa-miR-106a*	-2.27024	-3.16185	-0.0368155	-3.56362	0.957638	-1.62927	-0.773067
hsa-miR-106b*	-0.598772	-1.89616	0.524355	10.6536	3.66588	-1.23187	-0.443989
hsa-miR-10a	1.24231	1.13398	19.5427	3.58767	67.8408	16.9081	18.4481
hsa-miR-10a*	0.174525	0.267903	0.695292	-1.44857	7.02097	0.949011	0.229111
hsa-miR-10b	5.18129	1.44923	41.348	20.2402	12.8513	12.7076	11.4571
hsa-miR-122	1.89664	-0.485479	1.9992	5.68089	1.74105	1.84158	2.91296
hsa-miR-122*	-2.56205	-3.42711	-3.44329	-2.51279	-2.03008	-4.36186	-1.37902
hsa-miR-1226	0.190581	0.555495	-0.915487	3.63164	-1.48059	-0.967972	3.18621
hsa-miR-1231	-5.25478	-4.48602	-3.39504	-6.85441	-3.94897	-6.00466	-4.32819
hsa-miR-1233	-0.251382	-2.59937	-0.128488	-0.684772	-0.973978	-1.62282	-1.14436
hsa-miR-1237	7.0084	4.6787	11.2331	6.77685	7.9456	6.67363	9.4976
hsa-miR-124	-1.24145	-2.3021	-2.52721	-0.784622	0.472936	-0.876585	-2.70767
hsa-miR-124*	-2.19928	-2.52052	-1.10416	-3.80725	-3.52219	-3.68565	-2.17208
hsa-miR-125b-1*	-1.35325	-2.2903	-1.64346	-1.42409	-0.493629	-3.68373	-1.34174
hsa-miR-125b-2*	9.11134	7.42193	10.1369	4.6994	1.83661	1.79263	4.18941
hsa-miR-126	-0.955775	-2.23462	11.0691	9.01116	3.78857	0.0829524	0.465446
hsa-miR-126*	0.410589	-1.68782	0.735349	-3.22214	-3.6121	-1.92477	-0.822062
hsa-miR-127-5p	-2.55842	-2.64948	-1.84129	-4.47496	-3.62483	-1.5368	-2.29936
hsa-miR-129*	1.39355	1.11693	0.227458	3.9835	2.81739	3.53263	5.31047
hsa-miR-129-3p	4.59598	2.01533	4.77401	8.48168	2.19354	5.39797	6.16144
hsa-miR-129-5p	0.660679	-2.19417	1.23941	1.59739	0.986206	0.608822	1.92696
hsa-miR-130a*	7.14036	5.07789	8.45934	1.9925	8.50514	9.03142	4.68995
hsa-miR-130b*	2.06542	-0.135088	-1.48023	3.8464	-0.833084	-1.05273	0.518485
hsa-miR-132	6.19548	3.22529	9.81906	9.45832	5.3448	6.80553	10.5099
hsa-miR-132*	1.0963	1.15658	1.3661	2.59962	-0.945436	0.513697	0.264957
hsa-miR-133a	-0.178402	-1.56554	-1.13084	-0.261362	-0.985136	-0.87208	0.416546
hsa-miR-133b	1.23377	-0.645564	0.171383	1.27	-0.421684	-1.68644	0.716726
hsa-miR-135a	-0.166102	-0.325298	-1.69416	-0.167851	-1.45745	-1.96189	-2.37006
hsa-miR-135b	1.14022	-1.86038	16.7304	16.6006	63.5438	7.97774	1.86929
hsa-miR-135b*	-2.85668	-6.19929	-3.23119	-6.18148	-2.94411	-4.9576	-4.78809
hsa-miR-138-1*	-1.14182	-4.34062	-0.469973	-4.48979	-2.35453	-2.44698	-3.20793
hsa-miR-139-5p	-1.8508	-2.44042	-1.48723	1.91086	-1.31624	-1.39921	-0.593883
hsa-miR-141	0.783986	-2.21364	-2.4636	4.12718	4.50881	-0.147451	2.23386
hsa-miR-141*	-2.9222	-4.16055	-2.72816	-4.46723	-2.97335	-1.53509	-3.00045
hsa-miR-142-3p	0.152145	-0.34111	-3.00769	1.9842	-0.724022	-0.520693	-0.817974
hsa-miR-142-5p	-5.0652	-5.49775	-4.74806	-5.5145	-4.01391	-4.97158	-4.51642
hsa-miR-143*	-0.199419	-1.02196	-1.36007	-1.24969	-1.06574	-1.54597	-0.689454
hsa-miR-144	-3.25441	-4.5859	-3.72901	-4.91178	-2.65075	-5.21553	-4.50159
hsa-miR-144*	-2.69894	-3.53685	-3.59124	-4.56892	-3.49359	-3.35518	-3.2498
hsa-miR-145*	-0.417067	-2.39772	-3.30102	-3.55328	-3.29607	-3.45588	-3.46234
hsa-miR-146a*	-1.375	-1.83889	-3.73605	-4.28779	-2.74039	-1.93587	-2.15607
hsa-miR-146b-3p	-2.40742	-3.03889	-2.22596	-4.67366	-2.83951	-3.42767	-3.31193
hsa-miR-146b-5p	0.895665	-1.15818	8.18086	3.0212	0.277574	4.43183	5.48759
hsa-miR-147	-1.96153	-3.47179	-2.53471	-2.46122	-2.03881	-1.38521	-1.54199
hsa-miR-147b	-1.75321	-4.05708	-3.542	-5.23201	-2.42172	-3.25391	-2.45322
hsa-miR-148a*	-0.7142	-1.09011	1.8185	-2.69382	5.07496	0.559424	-1.19157
hsa-miR-148b*	-0.427648	-2.65977	0.241468	-2.12502	-1.33547	-2.11188	-2.93797
hsa-miR-150	-1.05111	-0.786268	-1.84656	0.748573	-3.02132	-1.23536	0.317624
hsa-miR-153	-1.41758	-1.87296	514.818	-6.05282	-4.5517	195.648	-0.601176
hsa-miR-154*	4.35453	0.498126	-2.16862	-0.855551	-2.88414	-1.44099	-2.53449
hsa-miR-155*	-2.92312	-3.4532	-4.30423	-3.91153	-3.88293	-2.335	-1.46765
hsa-miR-15a*	0.613982	-0.258715	1.54067	2.14607	1.04467	1.74085	2.74712
hsa-miR-15b*	0.774997	-1.90424	0.70797	0.289217	-0.963621	-0.393766	0.566628
hsa-miR-16-1*	-2.12869	-2.60388	-2.85968	-1.61918	-2.44702	-2.67282	-0.910862
hsa-miR-16-2*	1.78337	0.101304	0.937987	5.96025	2.11663	1.47739	2.90631
hsa-miR-181a*	5.71581	1.9049	2.50132	5.23045	12.7611	-0.144103	2.92745
hsa-miR-181a-2*	1.16272	0.600107	0.425687	9.91578	0.46614	-0.445226	1.43459
hsa-miR-181c*	0.472233	-0.0783422	2.55635	0.513981	-0.612042	-0.0669579	1.31924
hsa-miR-182	-0.510966	-0.394715	13.0373	5.93323	14.0706	4.9354	-2.88628
hsa-miR-182*	-1.7865	-2.42655	0.156208	0.759657	-1.04493	-3.44784	-2.72023
hsa-miR-183	-1.30502	-2.58554	50.5653	29.3707	18.793	10.6111	-2.204
hsa-miR-183*	-0.256189	-3.84346	1.39921	3.53185	4.29299	-0.186135	-1.2543
hsa-miR-184	3.66507	0.641721	13.5371	0.185047	3.38981	2.59163	1.99168
hsa-miR-185*	1.15075	-2.91518	-0.751018	1.68321	-1.54406	-2.15845	-0.296261
hsa-miR-186*	0.565699	-3.51496	-0.11993	-1.05688	0.714123	0.855137	2.05646
hsa-miR-187	-2.44407	-4.11734	7.97512	-5.59233	-1.67199	3.39195	-1.93872
hsa-miR-188-3p	-1.2202	-2.71923	-1.96444	-3.90254	-1.8588	-2.10451	-0.822285
hsa-miR-18a*	-0.625145	-3.08471	-2.08192	-0.915082	-1.5989	-3.37786	0.723231
hsa-miR-18b*	2.38234	-0.201423	0.804576	0.268925	0.218963	0.567855	1.12844
hsa-miR-190	-0.706646	-1.57741	-1.19508	-4.65403	-2.11112	-0.947299	-1.39037
hsa-miR-190b	-0.436456	-2.61187	-0.7531	-5.02881	0.084652	-1.0295	-1.822
hsa-miR-191	-2.90479	-3.34293	-1.82387	-5.6813	-4.12786	-3.9571	-3.96367
hsa-miR-192	1.14638	-0.113223	1.91577	17.599	2.54139	1.88309	5.60816
hsa-miR-192*	-1.56421	-3.21459	-2.78986	-3.14999	-3.73822	-2.94033	-2.72618
hsa-miR-194	-1.52741	-2.37338	1.84063	17.4028	1.88671	2.12744	4.97965
hsa-miR-194*	1.57687	0.0735998	0.296875	0.17272	0.678925	-0.460911	1.34534
hsa-miR-195*	2.61302	1.43089	2.23566	4.18779	0.983277	0.493362	3.62239
hsa-miR-196a*	-2.37733	-3.64657	-2.92801	-4.63891	-2.91489	-4.97063	-2.36638
hsa-miR-19a*	-2.64497	-1.44424	-2.17143	-3.14129	-1.75783	-1.98204	-0.273571
hsa-miR-19b-1*	1.03146	-0.656811	11.3479	20.3722	9.30117	8.49564	13.0973
hsa-miR-19b-2*	-1.47009	-0.932216	-1.30628	-1.75385	-0.0288384	-0.920252	-2.13599
hsa-miR-200a	-1.5462	-2.26985	-2.1696	-2.35823	-0.276152	-2.35059	-2.24212
hsa-miR-200a*	-0.34551	-0.447194	-0.294327	0.801281	1.15711	0.0583033	0.951352
hsa-miR-200b	-1.49648	-2.6466	-1.74077	0.710786	-0.159839	-2.64542	-1.36696
hsa-miR-200b*	3.28903	-0.533582	1.33424	0.389251	2.63054	0.874764	2.6188
hsa-miR-200c	-2.32068	-4.65505	-2.28132	-3.04908	-1.90901	-1.27322	-0.466343
hsa-miR-200c*	-1.14313	-1.22216	-2.37853	19.7807	-2.06496	-0.935133	-1.74813
hsa-miR-202*	-0.874957	-2.15033	-2.75416	-1.363	-3.67328	-2.23518	-1.82031
hsa-miR-203	-1.9676	-2.9566	-0.00805203	-3.32713	-4.66146	-1.83804	-1.70779
hsa-miR-204	2.13613	0.62363	13.3461	11.4881	36.1473	36.0347	69.3815
hsa-miR-205	1.00018	-1.17968	-1.50582	-2.23236	8.00199	-2.64346	-1.73
hsa-miR-206	2.08752	3.13477	6.04605	12.6077	8.49114	5.19465	4.87488
hsa-miR-208a	-4.00982	-5.99165	-4.33897	-7.45072	-5.09677	-4.41737	-3.74417
hsa-miR-208b	-3.63142	-4.26075	-3.26245	-5.26036	-4.28048	-4.18078	-2.4381
hsa-miR-20a*	-0.319185	-1.55315	3.02009	0.518494	1.00437	1.82201	10.1012
hsa-miR-20b*	-2.21126	-2.34525	-1.17103	-3.46737	-2.4604	-3.88827	-0.832538
hsa-miR-215	3.13917	1.45592	1.39022	7.81729	2.99141	1.72989	2.36397
hsa-miR-216a	-2.44176	-2.24958	-2.35069	-3.86034	-2.27325	-2.16811	-1.50242
hsa-miR-216b	-3.92617	-5.46307	-3.79243	-5.23211	-3.61241	-4.17545	-3.78356
hsa-miR-217	-3.28055	-4.12447	-3.62346	-6.20674	-3.80202	-3.05089	-2.56008
hsa-miR-218-1*	-3.36681	-5.77053	-2.41757	-5.1938	-3.9821	-4.1684	-4.1335
hsa-miR-218-2*	-0.728975	-3.01667	0.842534	-4.98853	-4.44111	-4.91242	-2.97667
hsa-miR-219-1-3p	-3.54155	-4.5008	-2.38659	-5.52705	-3.2227	-2.82299	-2.71565
hsa-miR-219-2-3p	-0.889116	-4.13928	-0.362032	-1.34922	-2.19189	-2.69051	0.0544131
hsa-miR-219-5p	7.64089	6.86415	7.29539	26.6261	3.1529	3.57314	10.3035
hsa-miR-220a	-2.09737	-1.55283	-2.5165	-0.815015	-1.82331	-3.10166	-1.23437
hsa-miR-220b	-1.8003	-1.86203	-2.61897	-3.18407	-3.70704	-4.09976	-1.82181
hsa-miR-220c	-0.778921	-0.912782	-2.47893	-2.44474	-0.0379066	-2.06351	-1.52044
hsa-miR-222*	1.71035	-2.74298	-2.45562	-2.07526	0.5307	-2.16863	-2.53585
hsa-miR-223	1.18077	-1.53185	-0.525077	0.770774	0.0814998	0.310723	1.04078
hsa-miR-223*	-1.6343	-2.51624	-2.64689	-4.18333	-2.55756	-3.13134	-3.78904
hsa-miR-24-2*	-2.93166	-4.49165	-4.2921	-5.48609	-5.05954	-4.5047	-3.96684
hsa-miR-25*	-3.37844	-4.45736	-2.0331	-3.29834	-0.290674	-2.63427	1.00328
hsa-miR-26a-1*	-0.714287	-1.70665	-1.1763	-0.482127	-0.948888	-1.62446	-1.06683
hsa-miR-26a-2*	-1.86636	-2.72121	-1.68029	-2.37204	-1.88452	-2.34686	-0.896151
hsa-miR-26b*	-0.176727	-0.691681	-0.823719	1.03718	-2.87767	-0.907048	-0.902944
hsa-miR-27a*	-1.99994	-2.62271	-2.58276	-3.98476	-2.83365	-3.52936	-2.47905
hsa-miR-27b*	-0.689361	-2.87262	0.0413362	-4.05263	-0.773171	-4.47234	-3.24713
hsa-miR-28-3p	-0.987494	-2.22479	-0.520769	-4.27458	-3.34188	-1.6537	-1.65589
hsa-miR-296-3p	-2.95938	-4.83091	-2.99736	-3.50582	-2.57759	-3.35963	-3.00619
hsa-miR-297	-2.35015	-2.51377	-1.24483	-1.90128	-1.01932	-0.770014	-1.90348
hsa-miR-298	-0.335487	-0.71034	1.74511	-3.27213	-0.693542	-0.470678	-0.460515
hsa-miR-29b-2*	-1.44846	-2.20678	-0.237744	-5.2048	-2.23724	-0.733685	-0.58364
hsa-miR-302a	1.82571	-0.279629	-0.517537	1.68922	-0.493334	0.735545	0.715919
hsa-miR-302a*	-1.52787	-2.77297	-3.04936	-2.08234	-3.12524	-2.51951	-2.02982
hsa-miR-302b	-1.18375	-0.829629	-1.14841	-1.95509	-0.871414	-1.10484	-0.737135
hsa-miR-302b*	-1.42006	-2.76368	-3.12631	-5.7022	-2.99121	-2.44063	-1.71612
hsa-miR-302c	0.136635	-1.08512	-0.578305	0.0845604	-1.01149	-0.917376	-0.660779
hsa-miR-302c*	-0.72053	-0.721484	0.754981	-1.52635	3.66721	0.380176	2.81924
hsa-miR-302d	-0.896541	-1.05153	-2.12337	-1.49482	-1.07147	-0.788361	-0.062989
hsa-miR-302d*	-4.52771	-4.27301	-3.29934	-6.14223	-3.41017	-3.60681	-2.39239
hsa-miR-30b*	5.13758	3.13241	7.79575	7.69874	13.1787	7.29234	9.41571
hsa-miR-30d*	-0.861022	-0.411431	3.47913	2.33918	7.00074	0.866571	6.00871
hsa-miR-323-3p	2.78977	-2.38457	-2.34554	-4.82232	-3.05177	-3.59885	-2.11597
hsa-miR-323-5p	-1.98964	-4.60173	-3.2849	-4.49558	-2.8001	-3.62043	-3.06967
hsa-miR-325	-0.685193	-4.64265	-1.81115	-2.41819	-3.12807	-1.50434	-1.71611
hsa-miR-326	0.878149	0.367221	2.59791	8.79102	4.86697	6.7973	15.6581
hsa-miR-330-3p	4.86682	2.91462	7.66003	12.0876	4.8514	5.85268	11.1361
hsa-miR-330-5p	-1.22944	-1.88596	-1.52402	-0.448748	-3.13612	-2.98829	-0.836917
hsa-miR-331-5p	0.0507295	-1.69596	0.174201	-3.01163	-1.15452	-1.34025	-0.366141
hsa-miR-335	-1.52957	-4.23429	-4.18672	-5.74763	-3.73425	-3.55814	-3.525
hsa-miR-335*	2.07631	2.33843	2.32766	2.80844	2.11082	4.98277	2.73012
hsa-miR-338-3p	-0.89768	-1.59177	15.626	-1.53986	31.6827	148.752	172.046
hsa-miR-339-3p	5.74791	2.66019	7.6586	4.42818	5.15951	3.85664	4.47035
hsa-miR-339-5p	-3.66629	-5.01608	-2.34077	-4.68324	-1.64883	-4.23475	-0.795672
hsa-miR-33a*	-1.06846	-2.50375	-0.75838	0.595205	0.162097	0.925426	-1.49562
hsa-miR-33b	0.123455	0.199858	0.0662756	0.443485	1.90684	-2.88116	-1.12631
hsa-miR-340	-1.6332	-3.42473	2.61239	6.37512	-2.93254	-0.518302	1.95798
hsa-miR-340*	-1.02681	-1.59261	0.752037	4.91887	-0.965797	-2.36142	0.664671
hsa-miR-342-5p	2.92922	0.635934	0.776919	3.61926	-0.652041	-1.475	0.0132453
hsa-miR-346	1.24377	1.65865	3.2185	1.87343	1.1769	1.96511	1.94056
hsa-miR-363	-0.466967	-2.71871	428.849	313.581	385.742	284.602	238.563
hsa-miR-363*	-3.19116	-2.60483	-2.36282	-4.64889	-1.22045	-2.67016	-1.57812
hsa-miR-367	-1.75763	-2.84928	-1.05802	-2.64766	0.601833	-2.38502	-2.43472
hsa-miR-367*	-1.519	-3.06468	-4.65994	-5.13104	-3.71478	-2.33201	-1.49463
hsa-miR-369-3p	-1.09347	-2.80286	-2.75281	-4.52093	-4.04799	-2.84524	-3.87976
hsa-miR-369-5p	6.08769	2.82879	-0.357122	1.39501	-2.03522	-1.17794	0.88479
hsa-miR-371-3p	3.20458	-0.480079	-0.284508	4.99462	-0.126314	-0.298541	2.41113
hsa-miR-372	-1.73114	-2.62442	-2.73191	-3.97487	-2.55764	-3.6877	-1.00968
hsa-miR-373	0.171499	-1.45683	1.72692	42.5322	2.6952	1.70964	0.635857
hsa-miR-374a*	-0.616885	-4.24044	-2.26784	-4.74598	-2.31704	-2.67866	-4.1758
hsa-miR-374b*	-0.641925	-3.40376	-1.67131	-3.68102	-0.698766	-1.41359	-1.64122
hsa-miR-375	-1.23467	-2.11497	-0.52585	-3.18276	-2.72012	-3.6214	-1.22455
hsa-miR-378*	-0.892591	-2.43913	5.57032	20.5062	2.01537	1.83758	4.81232
hsa-miR-379*	-0.911276	-2.72178	-3.23226	-2.79489	-3.18838	-4.00104	-3.01161
hsa-miR-380	-1.61485	-2.30022	-1.95018	-2.16698	-2.87003	-2.17347	-1.35884
hsa-miR-380*	-3.14771	-5.0107	-1.463	-4.91217	-3.68344	-5.01088	-3.57866
hsa-miR-383	0.0783839	-3.07112	0.0701725	-1.91739	3.12811	-1.12003	0.135203
hsa-miR-384	-2.90983	-4.76819	-4.92455	-5.50894	-4.93718	-3.61062	-3.69485
hsa-miR-412	-2.08493	-3.07793	-3.14614	-0.638976	-3.04978	-4.41184	-1.57352
hsa-miR-421	4.6838	0.353215	4.80555	1.80714	4.73395	2.39588	3.15488
hsa-miR-429	-2.37961	-2.28033	-2.09109	-2.83302	-1.75707	-2.45725	-2.61273
hsa-miR-432*	2.53315	1.21534	1.58681	1.63591	2.29044	1.85046	2.13779
hsa-miR-433	1.33789	-1.20613	-2.53231	-2.03671	-0.289417	-2.20164	-0.692166
hsa-miR-448	-2.07399	-3.65418	-2.56905	-4.7152	-2.93283	-2.55584	-2.21352
hsa-miR-449a	1.1853	-0.919193	1.64621	-0.0365107	4.36032	1.32648	1.07983
hsa-miR-449b	-1.23121	-0.869496	0.0360966	-3.20993	0.217217	1.05355	0.254467
hsa-miR-450b-3p	-1.94534	-1.84351	-1.13677	-2.57225	1.34667	-0.403118	-2.64254
hsa-miR-450b-5p	-1.51703	-4.17092	-1.99084	-2.7687	-2.10993	-1.76054	-1.35049
hsa-miR-451	-1.26851	-0.982341	-2.08535	-1.3709	-1.61598	-1.54612	-2.27546
hsa-miR-452	0.255557	-2.03731	-0.965908	12.3524	-0.898689	-1.81314	-2.77641
hsa-miR-452*	-3.07694	-4.87554	-3.24556	-5.3319	-5.10819	-4.11087	-4.57806
hsa-miR-453	-1.48933	-2.363	-2.21648	-1.88175	-2.70975	-3.20745	-0.747681
hsa-miR-454	-0.56481	0.0733661	6.72485	-0.816167	-0.612602	4.89652	6.83857
hsa-miR-454*	6.31129	4.65416	7.78057	1.81547	9.30168	8.16228	5.0847
hsa-miR-485-5p	2.92674	0.933433	-1.81473	-0.924706	-1.53218	-0.998209	1.55129
hsa-miR-486-3p	-2.96809	-4.67514	-2.85942	-5.80605	-3.46393	-3.89318	-3.12524
hsa-miR-487a	6.02891	3.16664	-2.7987	-2.97986	-1.91576	-0.572358	-1.91711
hsa-miR-488	-1.82248	-3.06044	-0.671711	-2.69116	-1.4523	-1.27907	-1.00622
hsa-miR-488*	-1.89556	-2.9318	-1.89565	-4.38362	-2.01478	-3.51684	-1.57596
hsa-miR-489	4.61041	1.39944	5.18792	0.938997	4.4993	0.887822	3.15083
hsa-miR-490-3p	-1.86002	-2.08534	-0.186742	-2.15347	-1.01919	-0.773957	-0.251239
hsa-miR-491-3p	5.53589	2.7543	3.99848	2.36588	42.3978	3.19103	1.6872
hsa-miR-491-5p	1.88369	-0.65943	0.760875	3.1181	6.09889	-1.73061	-0.539334
hsa-miR-493	3.10507	1.34493	3.6795	-2.09464	0.139305	0.609418	-0.00304529
hsa-miR-496	-3.29484	-1.49901	-3.5441	-4.18647	-1.91776	-3.63481	-3.66847
hsa-miR-497	4.92863	4.99939	-0.478246	26.994	5.97724	-1.58647	2.97882
hsa-miR-497*	0.154919	-3.7625	-2.08025	-2.56932	-3.55692	-2.21964	-1.62054
hsa-miR-499-3p	-2.45725	-3.16155	-2.37073	-4.05102	-4.03413	-2.6511	-2.65905
hsa-miR-499-5p	-2.46185	-3.6426	-0.715572	-1.968	-3.03828	-1.42847	-2.12513
hsa-miR-504	-1.28985	-2.86887	-2.15064	-2.04672	-2.12755	-2.26833	-1.82957
hsa-miR-505*	-1.03225	-1.81553	-0.544331	0.406785	-1.34748	-1.53335	-1.68805
hsa-miR-506	-0.0390188	-1.30202	-2.49522	-0.151618	-2.41893	-0.534497	2.05361
hsa-miR-507	0.3321	-1.3323	-1.69739	-2.8492	-0.916559	6.28233	4.75785
hsa-miR-508-3p	-0.668402	-1.85293	-0.1322	-1.87894	-0.91774	-2.47443	-0.221162
hsa-miR-508-5p	-1.00082	-2.84891	-0.947014	-1.57009	0.340993	-1.13014	-1.29315
hsa-miR-509-3p	-0.299997	-1.3054	-1.2746	-1.29089	0.493389	5.26387	6.89106
hsa-miR-509-5p	7.64589	2.43643	5.29535	2.74086	9.11951	5.44628	8.40751
hsa-miR-510	-1.94415	-3.53787	-1.35168	-2.60846	0.737192	-0.710747	0.542374
hsa-miR-511	-2.52813	-3.84395	-3.00746	-4.61757	-3.46867	-3.59727	-2.82338
hsa-miR-512-5p	-0.771726	-3.08171	-1.32167	-0.348006	0.195613	-2.76252	0.663642
hsa-miR-513a-3p	-1.99628	-4.20347	-0.62276	-1.80626	-1.6736	-3.33797	-1.12936
hsa-miR-514	-1.71248	-2.81441	-2.44243	-3.87726	-2.88867	1.86005	2.07696
hsa-miR-515-3p	0.196737	-0.0703548	-1.3429	2.63545	3.36788	-0.246884	1.68089
hsa-miR-515-5p	-2.72602	-4.14204	-2.31846	-4.13178	-1.6904	-3.42609	-3.12329
hsa-miR-516a-3p	-1.87132	-1.10624	-3.32122	-1.19179	-3.34275	-1.99017	-1.3265
hsa-miR-516b	2.63703	1.20672	3.07661	6.40456	9.15235	1.22834	2.56307
hsa-miR-517*	2.52778	1.17926	2.45581	-2.32993	3.25325	1.90292	-0.59142
hsa-miR-517a	0.224902	-0.915563	-0.820559	0.657103	1.64084	-2.09379	-0.642386
hsa-miR-517b	0.554765	-0.0786183	-0.880568	1.61102	0.943069	1.12517	0.956284
hsa-miR-517c	-2.05508	-2.60006	-1.02782	-2.4133	0.375787	-0.219123	-1.58972
hsa-miR-518a-3p	0.816813	-1.25982	-1.04355	2.73491	-0.244616	-1.48801	1.38241
hsa-miR-518b	0.34148	0.0514137	-1.55538	-1.41703	1.82722	-1.42581	0.396279
hsa-miR-518c	-1.34423	-1.21778	-1.47924	-2.78273	-1.35273	-2.05546	-2.10631
hsa-miR-518d-3p	1.10576	0.420178	0.531477	0.41128	-1.63535	-0.490361	-1.63385
hsa-miR-518d-5p	0.0943318	-0.424696	-0.505599	-2.07814	0.619565	-0.357193	0.566556
hsa-miR-518e	-0.141037	-0.131815	-2.28479	0.327063	-0.192955	-1.06301	-1.83213
hsa-miR-518e*	-1.45696	-3.01625	-1.2849	-4.88195	-0.656465	-2.1824	-1.45648
hsa-miR-518f	-1.51787	-3.53353	-2.11693	-2.77036	-1.55402	-2.65648	-3.48978
hsa-miR-518f*	-0.215966	-0.907924	-0.293832	-0.544763	0.234321	-1.19807	-1.57325
hsa-miR-519a	-0.555601	-0.931869	0.0581411	-1.47249	-0.65637	-0.767598	-0.369307
hsa-miR-519b-3p	0.318192	-2.1008	-1.04183	-1.0446	1.15762	-2.01738	-0.673028
hsa-miR-519c-3p	-0.654852	-1.8315	-1.86874	-3.17383	2.26675	-1.10036	-1.47653
hsa-miR-519d	3.29812	3.33026	1.80487	7.43487	3.46062	3.41625	6.74528
hsa-miR-519e	1.92144	1.99162	-1.01753	5.11984	1.22929	-1.13567	3.6133
hsa-miR-519e*	6.40465	2.66248	4.09566	1.53266	3.85497	3.16264	2.89509
hsa-miR-520a-3p	1.43431	1.45312	-0.778395	5.16154	-0.127799	-0.305979	2.13609
hsa-miR-520a-5p	-2.52483	-4.22048	-2.6619	-4.14129	-0.828805	-2.64765	-2.50085
hsa-miR-520b	7.93156	4.58365	6.73481	5.64119	4.6948	3.21841	3.14532
hsa-miR-520c-3p	-0.368709	-0.314122	-1.84166	1.18576	6.49805	-0.710591	1.6546
hsa-miR-520d-3p	3.4847	2.59203	2.03121	7.41957	10.6327	1.46571	3.27597
hsa-miR-520d-5p	-1.15053	-3.05574	0.641301	-2.49975	0.763772	-0.534285	0.683039
hsa-miR-520e	5.44156	1.9877	5.30882	3.54491	1.06133	2.37853	2.78223
hsa-miR-520f	0.0717395	0.917415	1.80593	2.33893	2.98738	0.791176	1.63364
hsa-miR-520g	0.479773	0.979204	0.162965	4.65778	1.13446	0.281468	0.844863
hsa-miR-520h	-1.40364	-1.06251	-2.51762	-0.148981	-1.21582	-3.17145	-0.340014
hsa-miR-521	1.56648	1.24751	0.317342	3.81238	0.350091	0.669012	1.31416
hsa-miR-522	0.147503	-1.51949	-0.592904	-1.3688	-1.83489	-1.66011	-0.625225
hsa-miR-523	-2.67991	-2.85801	-3.11871	-2.17174	-1.81017	-2.92708	-2.20067
hsa-miR-524-3p	-1.20466	-1.72724	-2.11666	0.283556	-2.25453	-1.26673	-0.752094
hsa-miR-524-5p	0.545181	-2.86799	-1.93094	-0.945057	1.49717	-2.17768	-1.74074
hsa-miR-525-3p	-1.37809	-1.79981	-2.25689	-2.69162	-2.34777	-3.10337	-1.29156
hsa-miR-525-5p	3.15069	-0.184239	1.17634	0.568225	3.14218	0.496335	2.52374
hsa-miR-526b	3.81022	0.857779	0.120312	3.57864	6.33249	0.324396	2.28271
hsa-miR-526b*	1.13053	0.734417	2.02517	-0.151608	-2.43733	-1.03787	1.91528
hsa-miR-527	-1.09447	-4.63194	-2.63582	-2.19616	-1.86119	-4.30797	-1.64321
hsa-miR-539	5.29432	4.64552	5.22663	14.3619	3.80514	5.53011	3.90145
hsa-miR-541	-1.53967	-4.95677	-1.65886	-4.25392	-3.03737	-3.09421	-2.58813
hsa-miR-541*	1.45789	-0.661312	0.404244	-0.18251	3.64824	-0.708674	0.402833
hsa-miR-544	-1.70506	-2.97679	-1.77212	-3.42444	-1.57251	-0.813959	-1.46015
hsa-miR-545*	-2.36014	-4.25719	-3.63439	-4.4069	-2.84451	-3.24821	-3.76681
hsa-miR-548a-3p	-2.06016	-3.85544	-2.49329	-3.06632	-3.17977	-2.78331	-1.83726
hsa-miR-548a-5p	-1.52834	-3.59203	-1.00711	-4.68198	-3.28648	-2.03084	-2.49942
hsa-miR-548b-3p	-0.144017	-1.50349	-1.18822	1.44091	-2.71443	-1.77578	0.291226
hsa-miR-548b-5p	-0.0118553	-1.00921	0.412023	-2.93132	-0.937121	0.376244	-1.86638
hsa-miR-548c-3p	-3.90452	-4.01323	-1.94042	-3.89122	-3.07283	-3.18355	-2.64293
hsa-miR-548c-5p	2.05631	0.0399194	6.3479	0.94268	0.97789	1.99346	1.33778
hsa-miR-548d-3p	-0.719565	-2.1034	-2.4418	-2.30548	-0.874651	-1.64435	-1.163
hsa-miR-548d-5p	0.295867	-0.874099	3.95551	-1.5045	1.51179	1.10929	2.05527
hsa-miR-549	-2.6327	-2.84384	-2.31266	-4.58834	-3.11369	-2.79003	-2.4446
hsa-miR-550	1.54553	0.475034	4.78611	0.613433	2.72421	3.26403	2.87282
hsa-miR-550*	2.12515	0.996828	9.75885	0.122598	3.98091	4.50781	9.3433
hsa-miR-551a	-1.02465	-3.86995	-3.69566	-3.19362	-1.2876	-3.61507	-2.74939
hsa-miR-551b*	-1.96933	-2.92142	-0.847419	-4.40119	-2.64452	-2.36201	-1.02484
hsa-miR-552	-2.37683	-2.39822	-2.16408	-3.49152	-2.63358	-2.3014	-2.2121
hsa-miR-553	-2.90767	-1.91099	-0.980268	-2.43439	-1.12851	-2.52926	-2.02621
hsa-miR-554	-2.24434	-4.82617	-1.20061	-5.03785	-2.24168	-3.215	-2.8104
hsa-miR-555	-3.71149	-1.58675	-2.14142	-2.64049	-4.52594	-3.3932	-1.72528
hsa-miR-556-3p	-0.595887	-1.65702	-2.51147	-1.99091	-3.25413	-1.47106	-1.08845
hsa-miR-556-5p	-4.05028	-2.28498	-2.64921	-5.0901	-3.14035	-3.27056	-3.26318
hsa-miR-558	-3.12302	-3.65524	-3.459	-4.40678	-2.57076	-3.32409	-2.2855
hsa-miR-559	-4.13643	-5.01898	-3.75659	-6.67297	-4.39125	-4.20787	-3.48333
hsa-miR-561	-3.15103	-3.49661	-3.7029	-4.60696	-3.3205	-3.28224	-1.65376
hsa-miR-562	-1.44613	-1.92784	-2.54749	-1.81965	-2.60705	-1.89772	-2.33194
hsa-miR-563	-1.26812	-2.1093	-1.22549	-2.79134	-1.86687	-1.92164	-1.36071
hsa-miR-566	0.472531	-1.04268	2.44868	1.83635	1.21715	-0.105895	0.792514
hsa-miR-567	-3.62089	-2.70805	-1.76973	-4.75931	-2.49462	-2.24508	-2.24578
hsa-miR-568	-0.176766	-1.41026	1.14088	-0.507787	5.15228	2.9943	-0.594418
hsa-miR-569	-3.12509	-4.12693	-2.8007	-4.54265	-2.65354	-3.53101	-3.26637
hsa-miR-570	-0.765503	-1.63362	-1.94756	-3.82928	-1.73285	-2.02849	-1.64227
hsa-miR-571	-1.83489	-2.56045	-1.52648	-1.83049	-0.234928	-0.753806	-0.847316
hsa-miR-573	-2.06487	-3.28362	-2.03117	-4.67668	-3.03735	-2.38277	-3.19145
hsa-miR-576-3p	-4.30845	-3.33794	-2.74053	-6.06219	-2.36551	-2.49976	-3.23147
hsa-miR-576-5p	-0.526775	-2.09005	-1.62209	0.00242758	-0.0619604	-0.0256762	0.434159
hsa-miR-577	-3.06861	-5.23568	-2.9173	-6.76332	-3.34161	-0.858865	-3.01203
hsa-miR-578	-1.3129	-2.94835	-2.52847	-2.45268	-2.55062	-2.2369	-2.74544
hsa-miR-579	-2.46153	-2.81764	-2.99114	-4.34009	-1.99767	-1.9552	-1.06929
hsa-miR-580	-2.03902	-5.34105	-2.34623	-6.02115	-2.72064	-3.3496	-3.64257
hsa-miR-581	-1.97269	-3.19443	-2.86652	-4.31378	-2.17404	-2.20558	-1.66074
hsa-miR-582-3p	-1.63509	-2.56958	2.56045	1.27599	-1.49698	-2.66314	-0.500499
hsa-miR-582-5p	0.514788	-0.397271	10.5895	5.81255	-0.0162872	1.62099	7.59222
hsa-miR-583	-0.283718	-1.61594	2.41812	-2.52607	-0.21246	1.24911	1.43047
hsa-miR-585	4.16948	2.88176	-1.55445	-2.44837	-3.33347	-1.66785	-1.62004
hsa-miR-586	-2.08179	-2.35956	-2.16991	-3.05661	-1.63023	-1.70114	-1.30282
hsa-miR-587	-3.22515	-3.10438	-2.6957	-4.8435	-3.27939	-3.57141	-4.92155
hsa-miR-588	-3.77379	-2.80947	-2.36595	-6.41406	-3.94748	-4.04315	-3.63528
hsa-miR-589	-3.02723	-5.61755	-2.63153	-3.1138	-1.84999	-3.39254	-2.73427
hsa-miR-589*	-1.89426	-2.09082	-0.893778	-4.54059	-1.64003	-2.39415	-1.79084
hsa-miR-590-3p	-2.15905	-4.43127	-2.41941	-5.64511	-3.90973	-1.33384	-3.33746
hsa-miR-591	-2.18162	-4.11159	-1.70884	-2.25207	-2.81932	-0.966447	-2.75544
hsa-miR-592	-0.724956	-1.86577	-1.19203	-2.82994	10.0356	-2.71093	-1.58992
hsa-miR-593	-0.661618	-2.21502	-0.948951	1.52077	2.21917	-2.4869	-1.25376
hsa-miR-593*	-3.72575	-3.38841	-3.58387	-4.69152	-3.00946	-3.79536	-2.67248
hsa-miR-596	1.58412	-2.69478	4.58639	-2.39535	-0.896855	-1.05816	-0.610514
hsa-miR-597	-2.12788	-2.47873	-0.724403	-3.22581	-2.43839	-0.92707	-2.40997
hsa-miR-598	-1.0035	-0.490167	1.10429	0.751478	-2.42228	-0.052067	0.302216
hsa-miR-599	-3.23348	-3.57707	-2.94707	-5.09785	-3.78676	-2.39605	-3.71316
hsa-miR-600	-3.92158	-4.48216	-3.71267	-4.24133	-3.93844	-4.06355	-3.31758
hsa-miR-603	-2.99791	-4.31469	-3.79771	-2.85804	-3.25175	-4.44065	-3.17042
hsa-miR-604	-0.732031	-3.21754	-2.33763	-2.86456	-2.3943	-3.66759	-1.78518
hsa-miR-606	-3.58584	-6.52666	-3.04382	-6.92692	-5.70256	-5.30551	-4.93278
hsa-miR-607	-4.02551	-5.05686	-3.32248	-4.50401	-4.19022	-3.22965	-3.29817
hsa-miR-608	-1.56244	-3.44308	-2.54519	-2.07408	-3.29245	-2.38797	-2.31012
hsa-miR-610	6.21347	3.49176	7.55044	8.79504	6.76219	6.19383	5.81439
hsa-miR-611	-0.952552	-2.55519	-0.961994	-1.99359	-2.90986	-3.55206	-2.40632
hsa-miR-612	-1.79145	-3.38209	-2.16936	-2.35644	-2.25831	-2.48231	-2.45349
hsa-miR-613	0.868515	-0.745667	-0.541162	1.53859	-1.63065	-0.865956	0.100471
hsa-miR-614	1.51382	1.09683	2.8895	0.131844	0.922812	2.08634	-0.19143
hsa-miR-615-5p	-2.24394	-4.3802	-2.2178	-3.34992	-2.86997	-2.22351	-2.36765
hsa-miR-616	0.668619	-2.76804	-0.521351	-1.85203	-1.93963	-1.38767	-1.83109
hsa-miR-616*	-1.08566	-2.8447	-2.71446	-1.98582	-4.28324	-3.60076	-1.36276
hsa-miR-617	7.26599	5.75643	6.66411	5.80857	8.1624	7.41764	8.61597
hsa-miR-618	-1.29498	-2.78882	-2.01807	-1.88981	-2.15976	-3.06587	-1.39007
hsa-miR-619	0.107631	-0.854529	-0.544158	-1.98827	-1.6106	-0.351179	-1.93699
hsa-miR-620	-3.7784	-6.74799	-3.40355	-7.67165	-4.1978	-4.85635	-4.41834
hsa-miR-621	-1.97804	-4.78636	-2.84376	-5.41342	-4.22181	-4.1003	-3.81249
hsa-miR-624	-1.49477	-3.43624	-3.20655	-4.31925	-2.77982	-1.97786	-2.50456
hsa-miR-624*	-1.04072	-2.05732	0.163018	-1.36018	-2.10996	-1.30247	-1.303
hsa-miR-625	3.56349	2.87582	14.2683	-4.25332	9.47679	7.77215	4.5102
hsa-miR-625*	0.340211	0.67935	2.70611	1.72695	3.52259	2.42918	2.71143
hsa-miR-626	-2.09526	-3.33419	-3.08975	-3.1009	-2.70935	-2.74135	-3.05079
hsa-miR-627	0.273008	-1.53889	2.89314	-0.168549	2.44597	-0.167527	3.18782
hsa-miR-628-5p	0.580051	-1.04001	6.25037	-2.71374	-1.25571	1.1388	-1.7837
hsa-miR-629	-0.0748977	-0.944287	10.3951	-5.12749	12.1386	7.49891	10.8578
hsa-miR-631	8.23286	3.19544	7.54606	17.3325	14.6413	7.98243	7.74885
hsa-miR-632	-0.0928642	-1.50085	-0.0467661	0.3619	0.105642	0.0706582	-0.161667
hsa-miR-633	-3.11578	-5.35069	-4.18815	-5.08074	-3.69067	-3.33545	-3.54235
hsa-miR-634	4.15684	2.3701	3.98764	5.20089	6.57754	3.19563	6.02009
hsa-miR-635	-1.14013	-3.088	-2.56045	-1.50789	-2.58489	-3.78797	-0.345396
hsa-miR-637	-1.33511	-1.82011	-2.22254	-0.50415	-3.00082	-2.18783	-0.787025
hsa-miR-639	-0.935443	-2.2466	0.597634	-3.92748	-0.937847	-1.01031	-3.30199
hsa-miR-640	4.20365	5.73727	5.24359	5.88231	8.26675	7.80273	4.46404
hsa-miR-641	-0.79549	-1.92973	1.88389	-3.65239	-1.36962	1.20657	-1.12933
hsa-miR-642	-0.557456	-3.33958	-3.26702	-2.08953	-1.85292	-3.29331	-2.71449
hsa-miR-643	-3.09604	-3.83675	-2.56706	-5.56834	-3.81695	-3.02303	-4.05024
hsa-miR-644	-1.45381	-3.74491	-2.32948	-3.00351	-2.40656	-3.98843	-1.5927
hsa-miR-645	1.36268	0.999629	-0.293236	-2.24965	0.689845	-0.880197	1.10535
hsa-miR-646	-2.81382	-2.15254	-0.67304	-2.99028	-2.871	-2.99271	-1.48336
hsa-miR-647	5.12902	5.35546	7.87296	30.7352	19.639	11.3983	6.43924
hsa-miR-648	0.659061	-0.610014	1.90248	0.45092	0.714975	1.54977	2.55453
hsa-miR-649	-0.641487	-2.81934	-2.43388	-2.22711	-2.00988	-2.08347	-1.08559
hsa-miR-651	-2.48168	-4.25181	-3.50413	-4.52001	-2.40001	-4.24761	-1.67823
hsa-miR-652	4.16016	1.84307	106.143	18.4629	21.9154	52.4587	31.8275
hsa-miR-653	-2.94001	-4.48933	-3.20045	-4.34245	-4.42807	-3.54918	-2.65984
hsa-miR-655	-2.6144	-3.08647	-2.9032	-4.75107	-2.15219	-3.12266	-2.92609
hsa-miR-656	-2.50636	-3.41403	-3.85516	-3.21537	-2.97709	-2.71618	-1.12362
hsa-miR-657	-0.874918	-2.35831	-2.43347	-1.87008	-1.85274	-3.42261	-0.288451
hsa-miR-658	0.328637	-2.14452	-2.58201	-1.30545	-0.728382	-1.25596	-1.66239
hsa-miR-659	0.191571	-0.0843376	0.977734	-2.24847	0.512911	0.957749	0.377704
hsa-miR-661	-2.76276	-1.33788	-0.646446	-2.03756	-3.11582	-2.78605	-1.85938
hsa-miR-668	1.67873	1.57392	1.35842	4.27267	-0.331289	-0.620794	2.37343
hsa-miR-671-3p	-0.0974974	-2.16761	0.497865	-1.07335	-1.15506	-2.84229	-1.27904
hsa-miR-675	-1.93963	-4.05545	-2.9802	-4.1907	-3.57177	-3.53688	-2.10763
hsa-miR-7	2.83682	-1.05926	12.0495	36.544	15.1278	9.60545	7.29907
hsa-miR-7-1*	-2.11286	-4.16476	-1.04685	-2.84287	-2.0393	-1.14244	-2.53002
hsa-miR-7-2*	1.17822	0.270223	0.306364	1.33379	-2.78516	3.73564	1.84918
hsa-miR-708*	-2.12543	-2.61355	-2.54505	-0.196403	-2.87307	-2.5995	-2.2905
hsa-miR-767-3p	-1.4305	-2.83513	-0.479087	-1.40307	0.155689	-1.25441	-0.538988
hsa-miR-767-5p	-1.51558	-4.57703	-1.36215	-3.83416	11.1129	-2.3746	-0.401861
hsa-miR-802	-2.3373	-4.38079	-3.15924	-5.88083	-4.88455	-3.12158	-2.573
hsa-miR-873	-0.432876	-3.27871	16.8003	3.08404	2.76161	5.2839	2.91694
hsa-miR-875-3p	-2.00572	-3.64515	-3.59976	-3.69016	-2.4655	-4.07826	-2.95826
hsa-miR-875-5p	-1.72182	-2.5325	-2.03093	-0.868659	-2.921	-1.23052	-0.948478
hsa-miR-876-3p	-2.57724	-4.76955	7.71472	-3.26362	1.97435	-0.398086	-1.6867
hsa-miR-876-5p	0.365506	-0.343666	20.8603	2.1343	6.93741	6.0098	1.17369
hsa-miR-885-3p	0.408768	-1.45302	1.03297	-1.48147	0.0375672	0.40989	0.655652
hsa-miR-888	-4.46003	-5.95837	-2.81615	-4.12849	-4.03873	-4.26896	-3.50093
hsa-miR-888*	-1.57864	-2.62792	-1.54792	-3.04166	-2.98672	-2.21034	-1.2445
hsa-miR-889	-0.716704	-1.37261	-2.43777	-5.13774	-3.09323	-3.27001	-3.95765
hsa-miR-890	-2.9674	-4.19636	-2.92609	-5.36508	-2.56899	-3.02342	-2.53424
hsa-miR-891a	-3.10258	-4.1111	-1.85185	-1.41593	-2.16548	-2.01982	-0.873651
hsa-miR-891b	-0.269368	-3.42821	-2.51378	-2.62464	-4.05311	-2.14361	-2.51893
hsa-miR-892a	-1.30352	-1.12013	-1.24821	1.8164	-0.163628	-1.73909	0.670889
hsa-miR-9	-2.91268	-3.38142	-0.123427	-0.124991	0.0366502	8.95345	29.586
hsa-miR-9*	-3.78497	-5.94713	-3.45673	-4.73824	-4.05531	3.6291	12.4483
hsa-miR-920	-2.75357	-4.00387	-2.20085	-6.30178	-3.30558	-3.68921	-2.68738
hsa-miR-922	-4.26534	-5.64429	-2.67454	-7.3544	-4.84946	-4.58547	-4.02336
hsa-miR-924	1.80692	-0.426401	0.0756584	2.07735	-0.349919	-0.822179	-0.412272
hsa-miR-92a-1*	0.572616	-3.23819	2.35861	-1.02547	0.866271	1.71233	5.76713
hsa-miR-92a-2*	-0.66426	-1.64554	-1.56152	-2.38389	1.54558	-1.50911	0.285834
hsa-miR-92b*	-1.54609	-2.55125	-3.0654	-4.06226	-3.57388	-2.4423	-2.79167
hsa-miR-93*	-1.31713	-2.53779	-0.713877	-0.415456	-0.46402	-1.44378	1.08347
hsa-miR-934	0.332402	0.655319	-2.37269	-2.81647	-2.21963	-2.4745	-3.50783
hsa-miR-935	-1.68939	-3.15749	-0.844599	-0.176528	-1.96089	-3.68977	-2.15377
hsa-miR-938	-3.08776	-2.62603	-3.23709	-4.53203	-4.02968	-1.93478	-2.81114
hsa-miR-941	-3.02817	-5.01262	-3.10184	-6.68676	-4.25594	-4.2773	-3.30569
hsa-miR-942	-0.681187	-0.898696	-0.863255	-1.92804	-0.966699	-1.1244	-1.43642
hsa-miR-943	-1.4451	-0.815051	-1.82135	-1.69545	-1.50851	-2.61066	-1.62463
hsa-miR-944	-2.78082	-3.17819	-2.36717	-4.19916	-3.05814	-2.73004	-2.81861
hsa-miR-95	-1.15708	-3.61729	-0.453517	-1.72489	-0.20947	-2.62647	-2.50843
hsa-miR-96	-0.592786	-2.59721	283.973	191.59	171.636	79.9539	-0.901123
hsa-miR-96*	-2.92131	-3.23414	-2.9631	-3.39656	-2.17697	-4.24477	-2.42607
hsa-miR-99a*	0.0492856	-2.15878	-1.43377	-2.69007	-2.98978	-2.42239	-0.745934
